# Supplementary material for: Emergence of visually-evoked reward expectation signals in dopamine neurons via the superior colliculus in V1 lesioned monkeys
Source: eLife journal article supplement (doi:10.7554/elife.24459), 2017-06-19
Supplement: supp [file elife-24459-supp-v1.zip]

Archive with 6 entries (6 files):
- elife_poa_e24459_Figure_1_figure_supplement_1.pdf
- elife_poa_e24459_Figure_4_figure_supplement_1.pdf
- elife_poa_e24459_Figure_4_figure_supplement_2.pdf
- elife_poa_e24459_Figure_3_figure_supplement_1.pdf
- elife_poa_e24459_Figure_3_figure_supplement_2.pdf
- elife_poa_e24459_Figure_2_figure_supplement_1.pdf
