# Supplementary figures and images for: Emergence of visually-evoked reward expectation signals in dopamine neurons via the superior colliculus in V1 lesioned monkeys
Source: eLife journal article supplement (doi:10.7554/elife.24459), 2017-06-19

A

V1

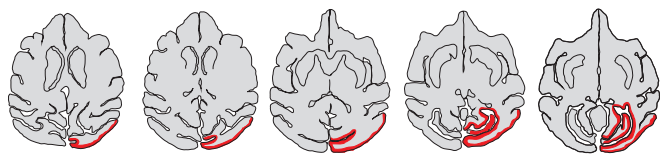

B

Monkey K

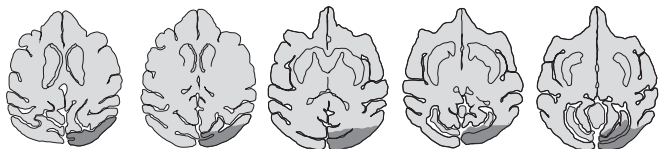

Monkey U

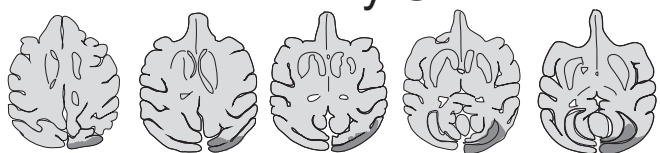

Monkey T

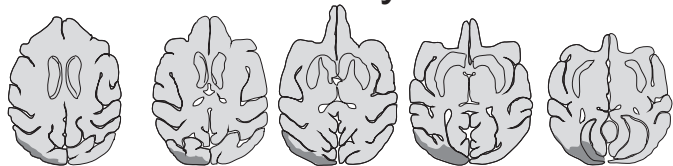

C

Monkey K

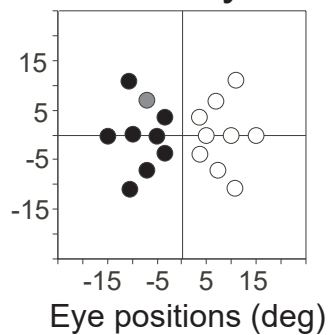

Monkey U

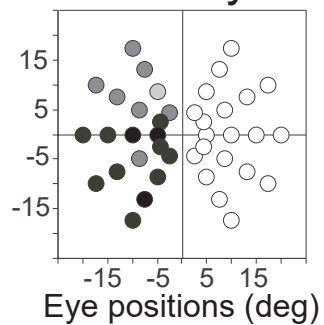

Monkey T

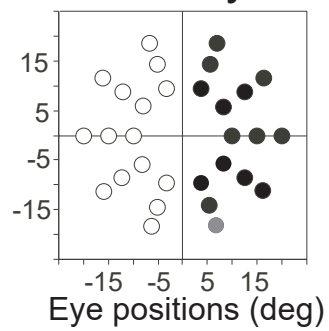

Threshold for  
Luminance contrast

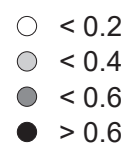

Supplement: supp [file elife-24459-supp-v1.zip › elife_poa_e24459_Figure_1_figure_supplement_1.pdf]

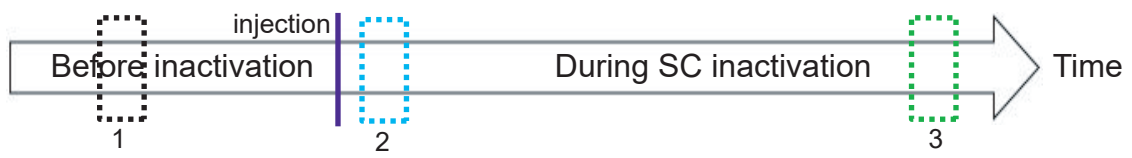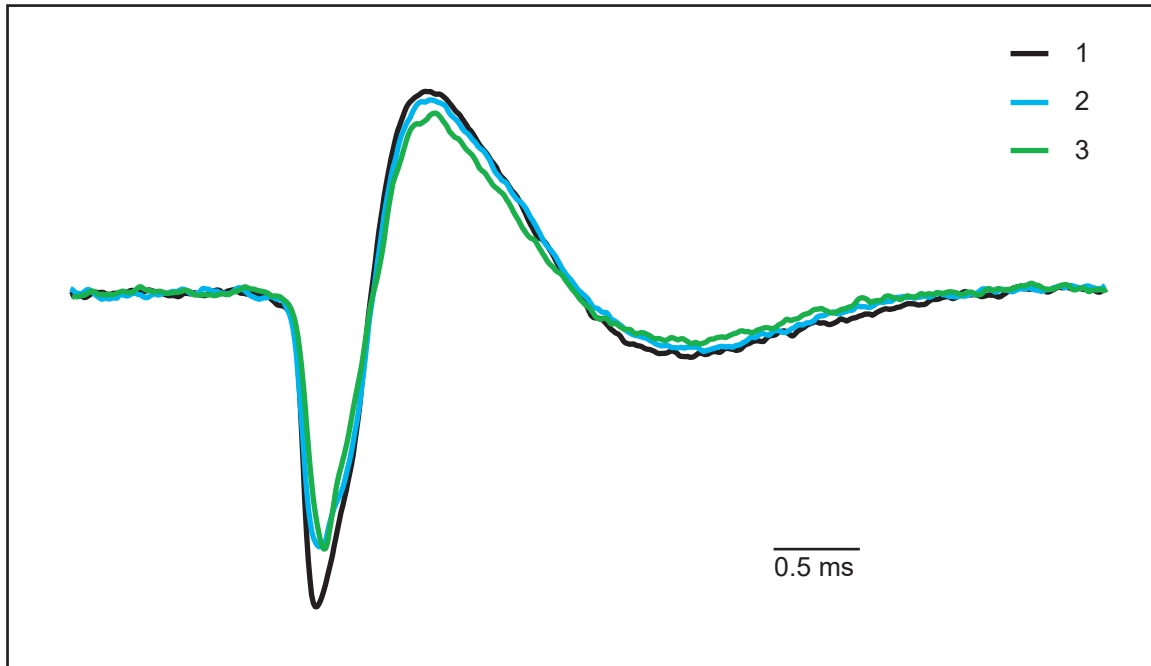

Supplement: supp [file elife-24459-supp-v1.zip › elife_poa_e24459_Figure_4_figure_supplement_1.pdf]

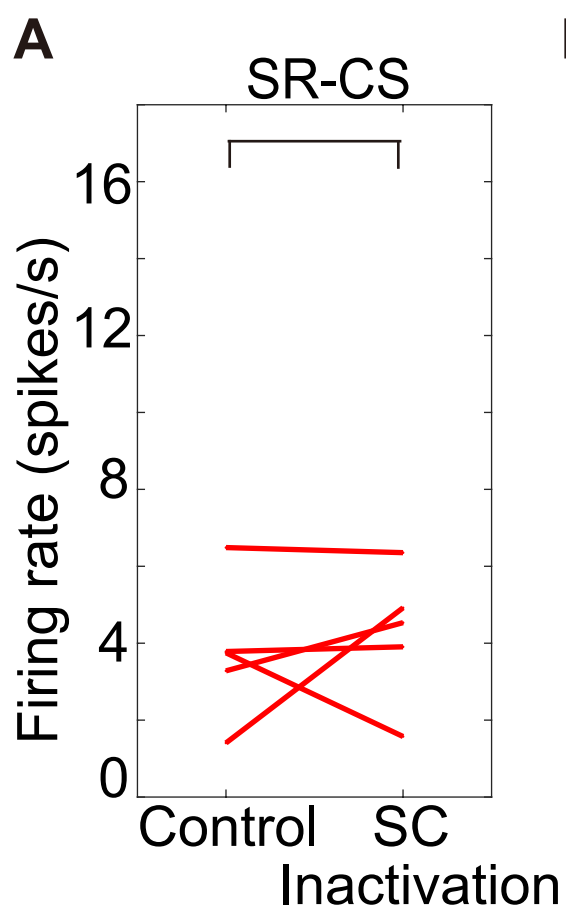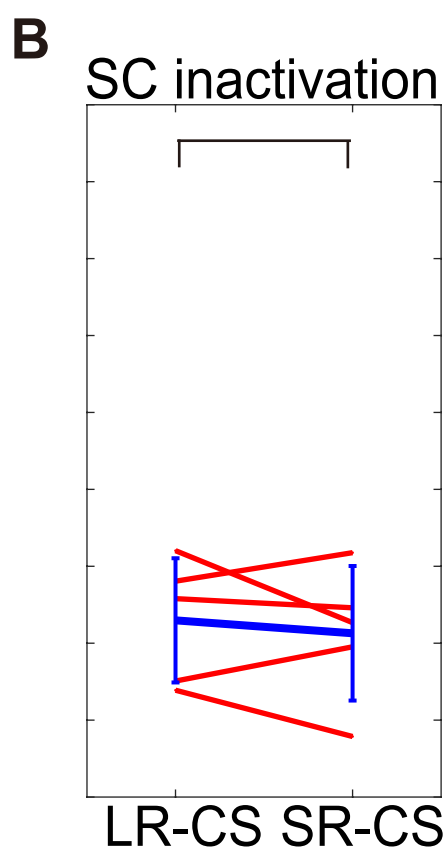

Supplement: supp [file elife-24459-supp-v1.zip › elife_poa_e24459_Figure_4_figure_supplement_2.pdf]

# Monkey K

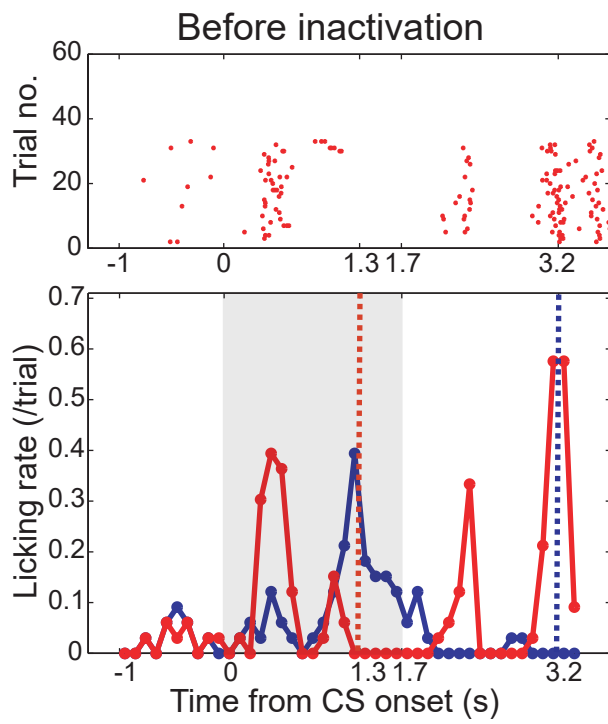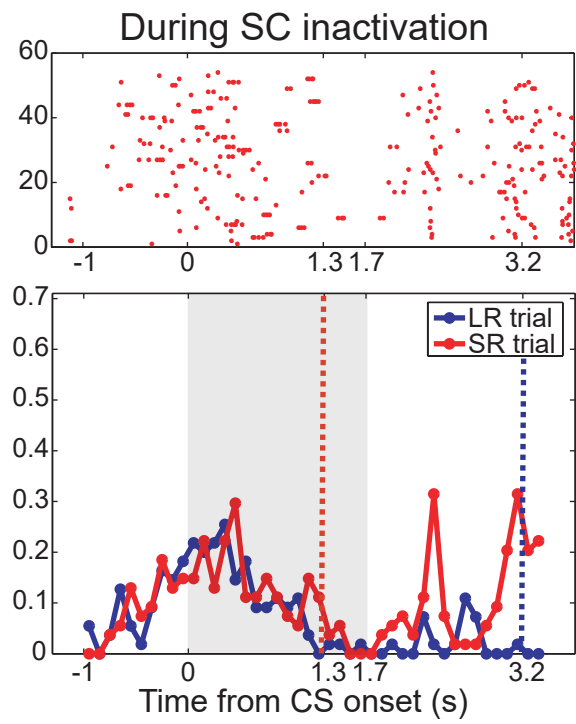

Supplement: supp [file elife-24459-supp-v1.zip › elife_poa_e24459_Figure_3_figure_supplement_1.pdf]

**A**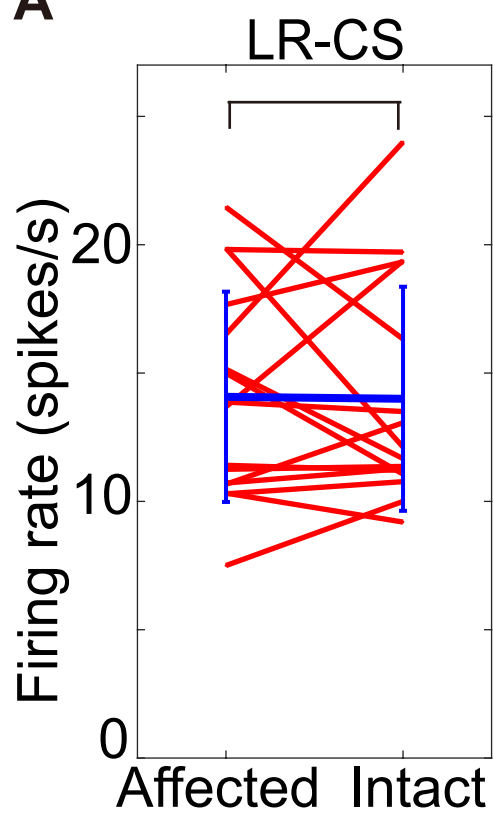**B**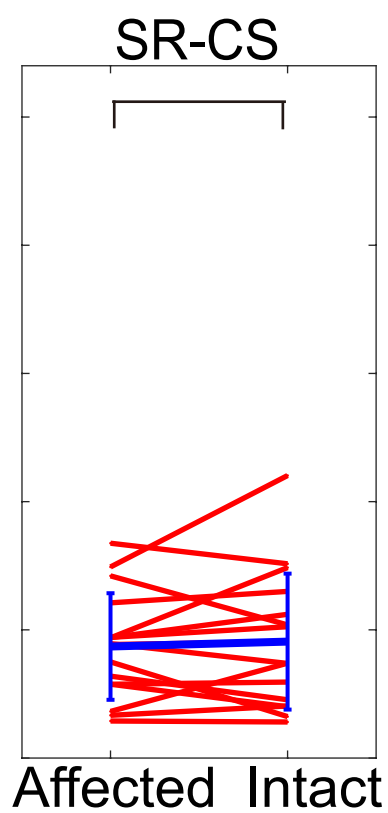

Supplement: supp [file elife-24459-supp-v1.zip › elife_poa_e24459_Figure_3_figure_supplement_2.pdf]

# A

## Monkey U

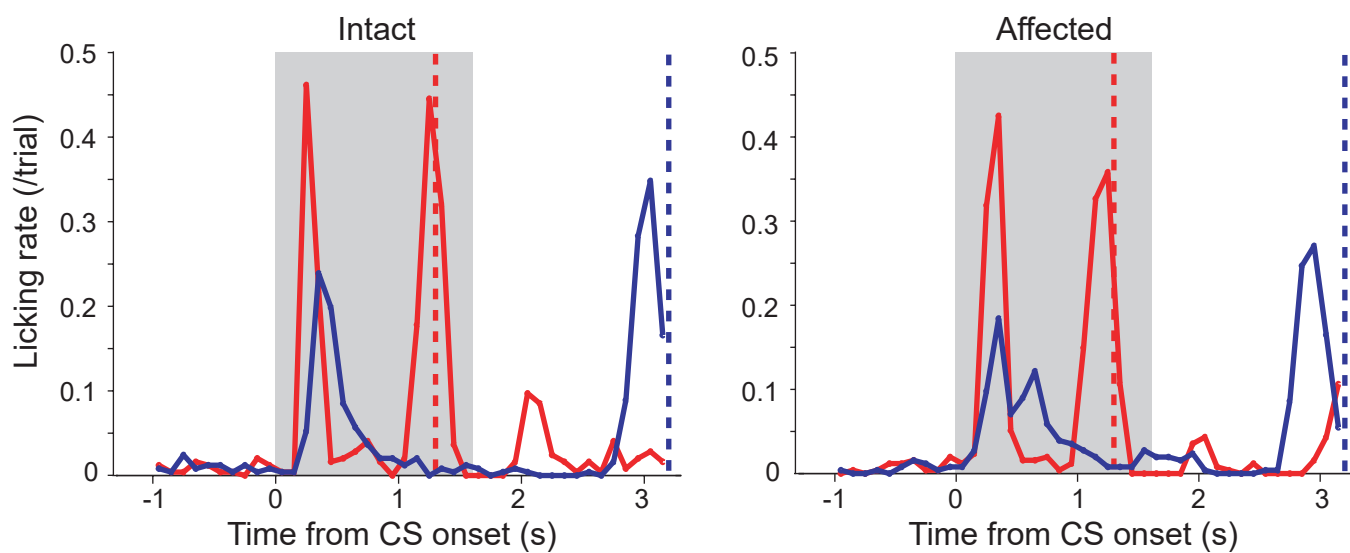

# B

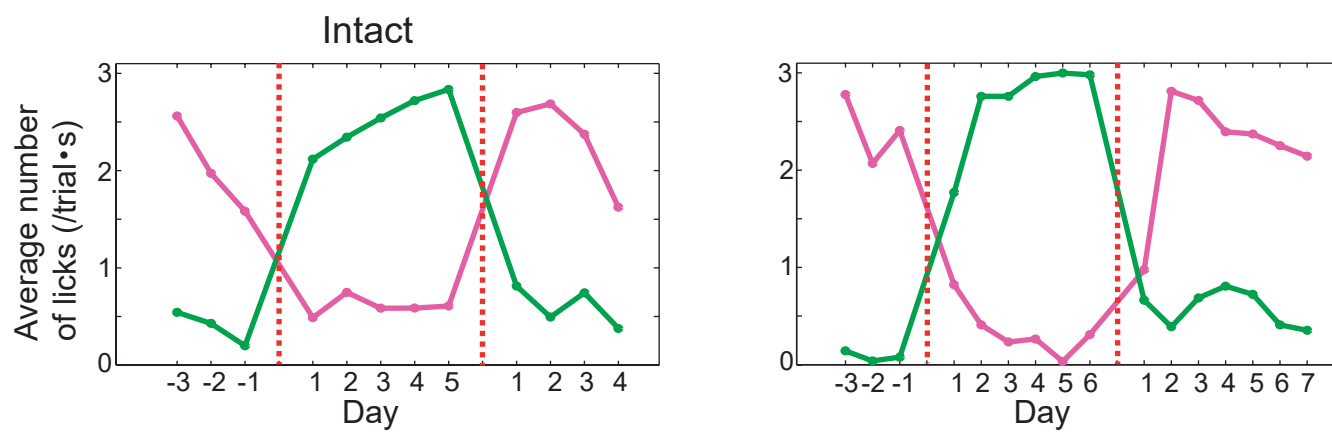

Supplement: supp [file elife-24459-supp-v1.zip › elife_poa_e24459_Figure_2_figure_supplement_1.pdf]
